# Supplementary material for: Mitochondria-targeted paraquat and metformin mediate ROS production to induce multiple pathways of retrograde signaling: A dose-dependent phenomenon
Source: PubMed Central journal article supplement — Redox Biol. 2020 Jun 21;36:101606. doi: 10.1016/j.redox.2020.101606 (PMC7327929; doi:10.1016/j.redox.2020.101606), 2020-06-21

Supplemental Figure 1

A)

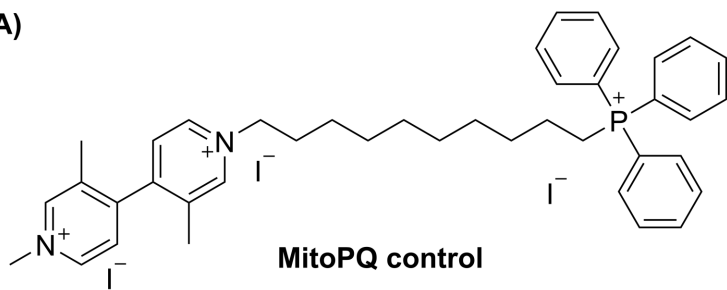

B)

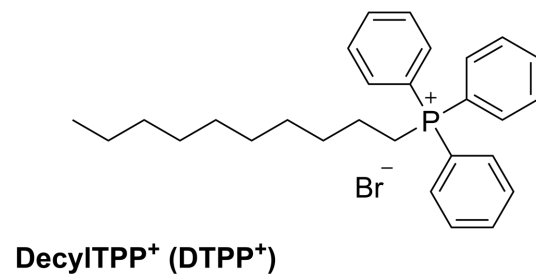

C)

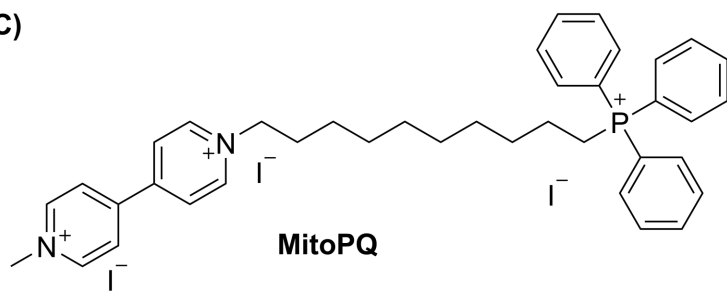

D)

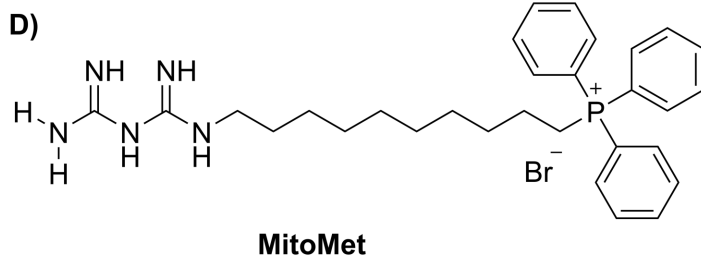

E)

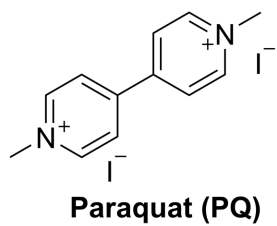

F)

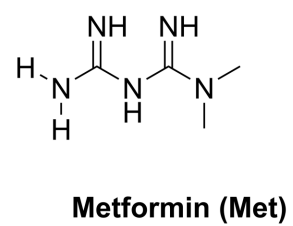

Supplemental Figure 2

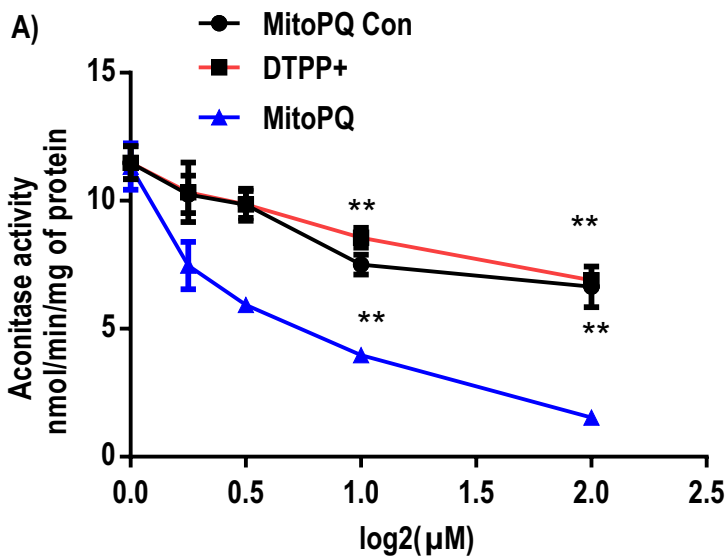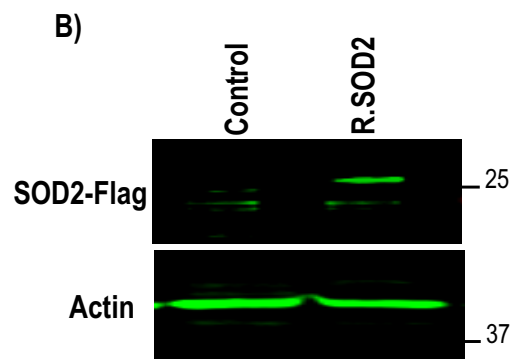

Supplemental Figure 3

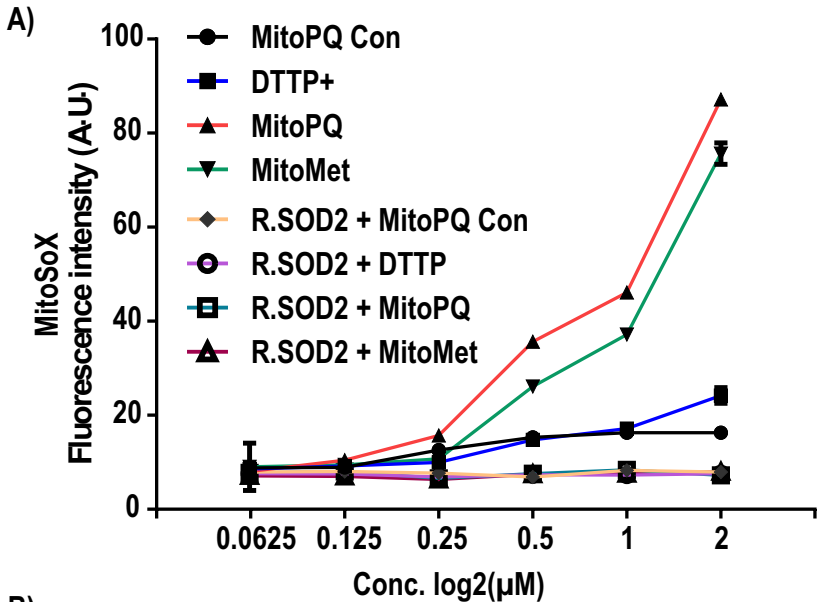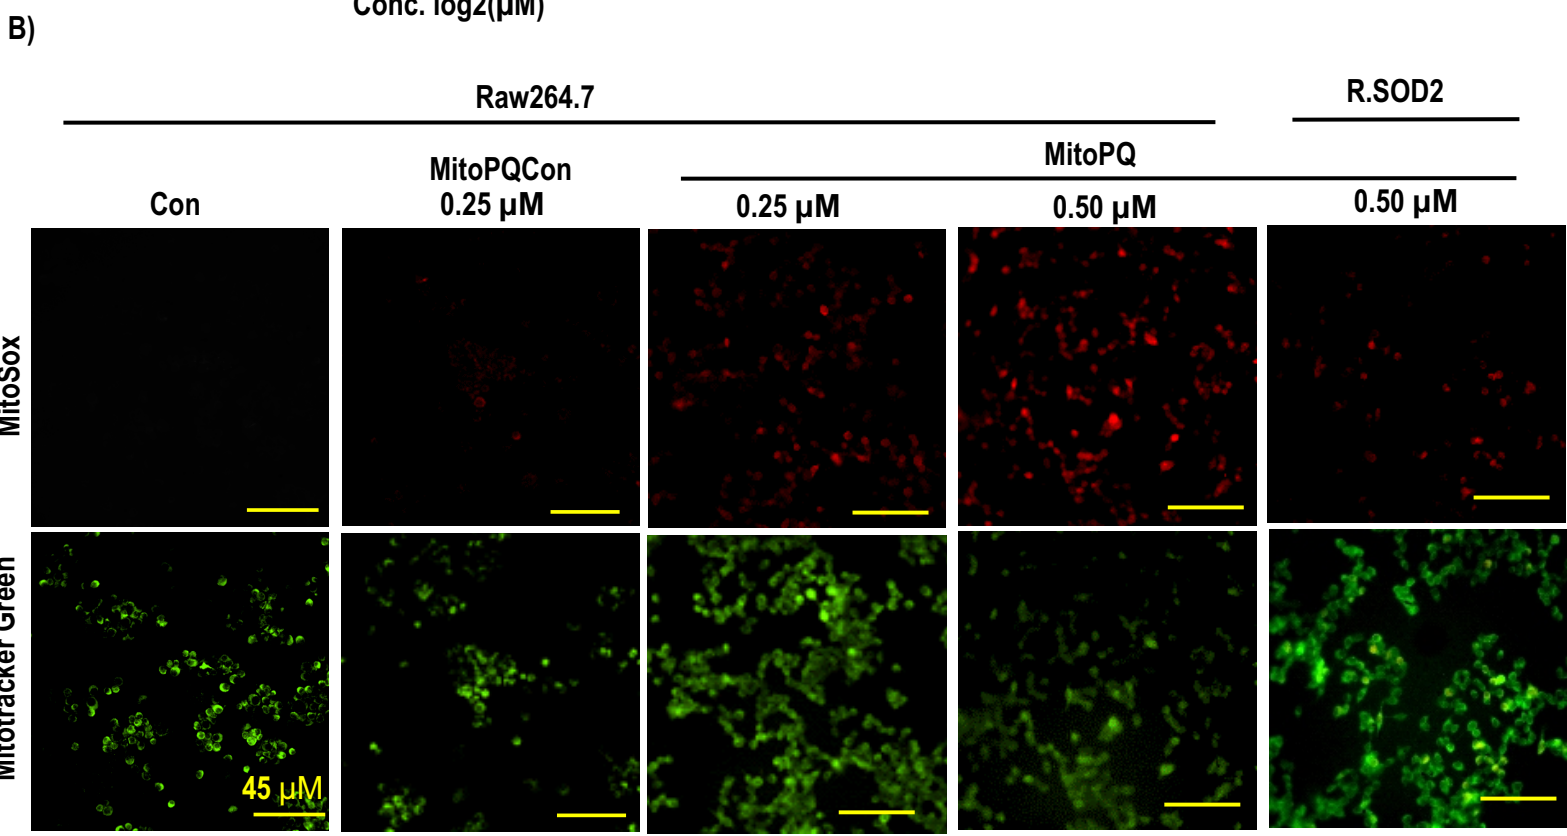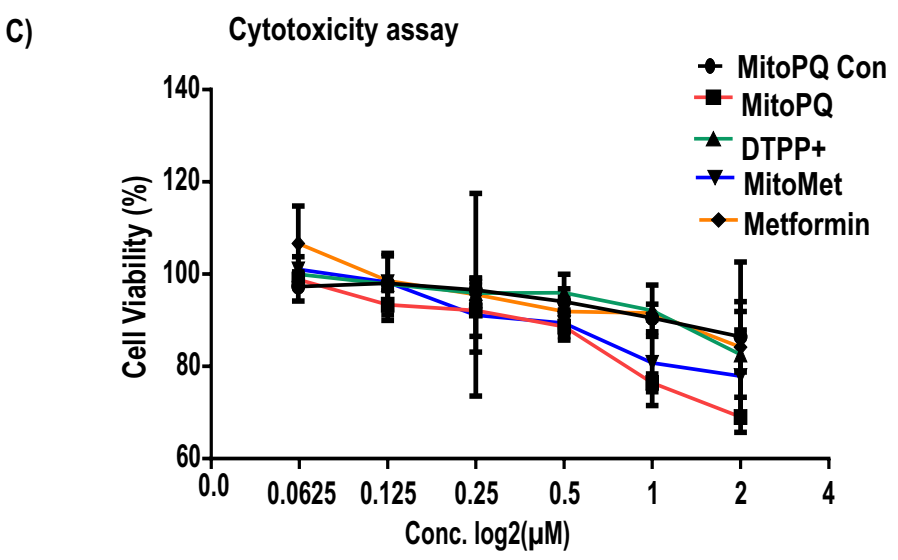

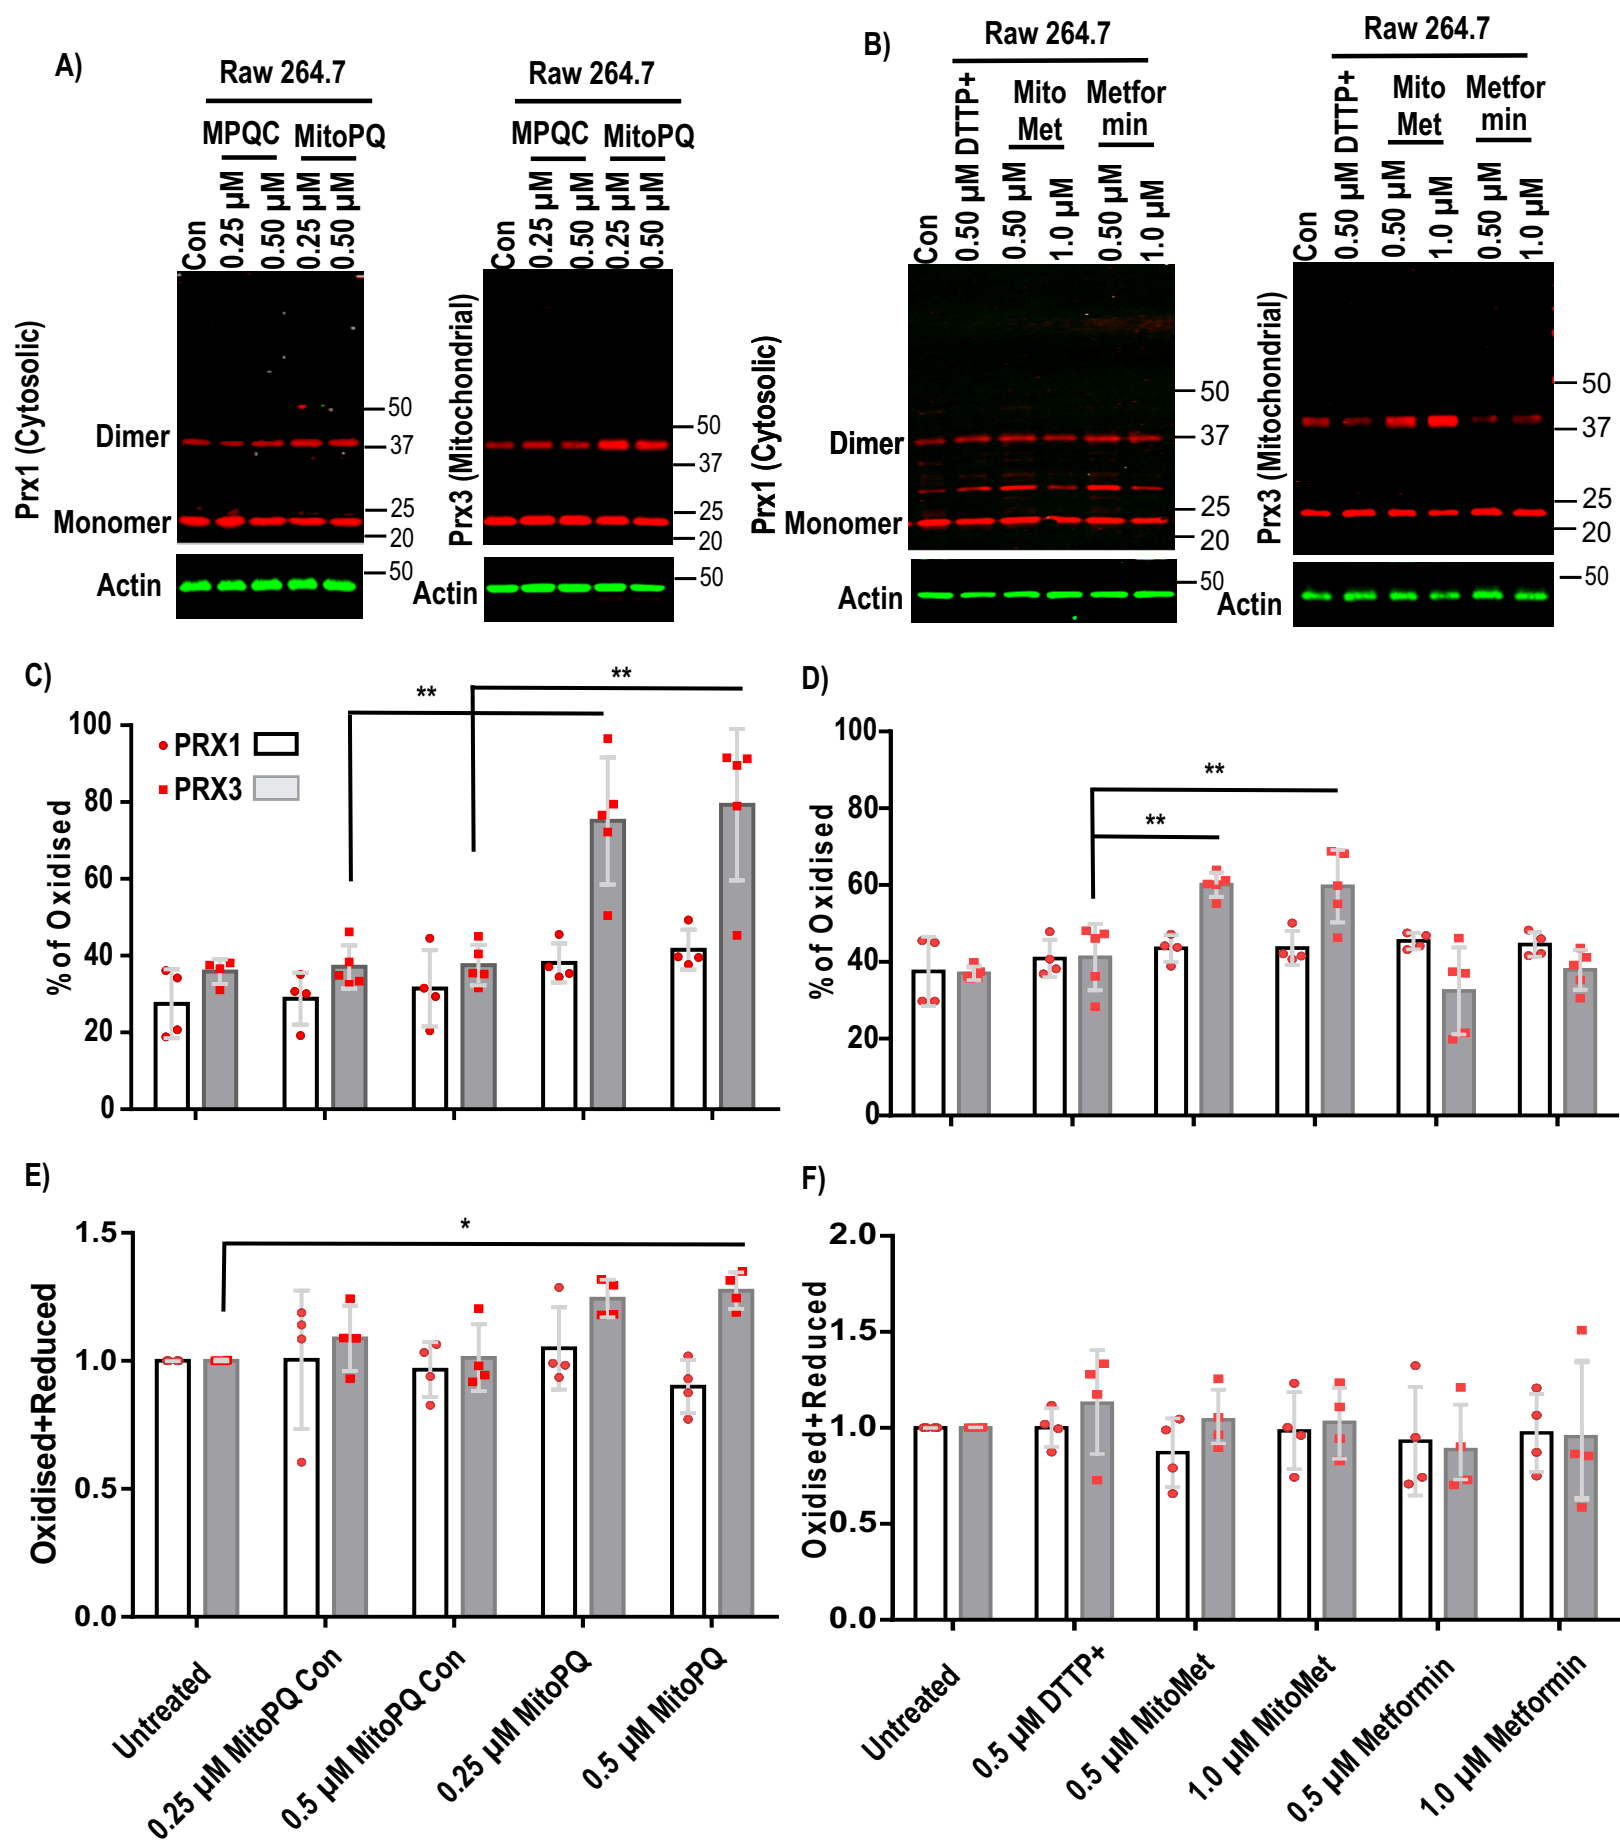

Supplemental Figure 5

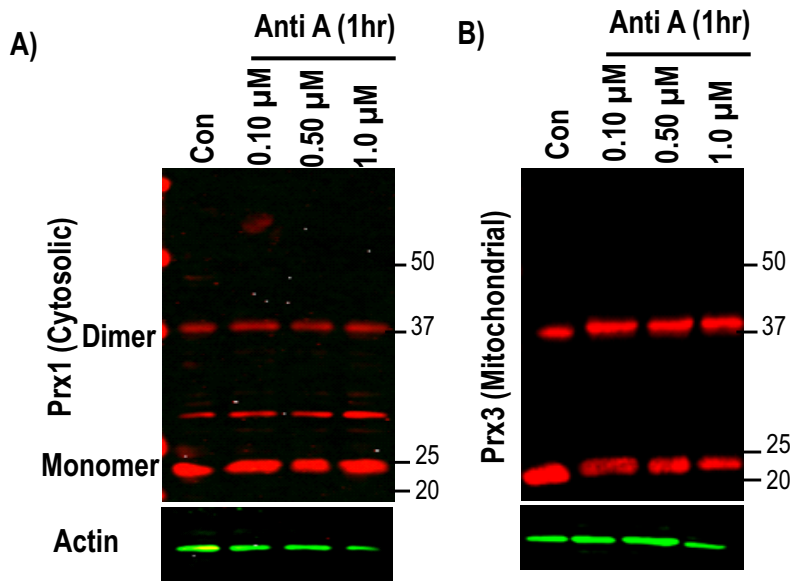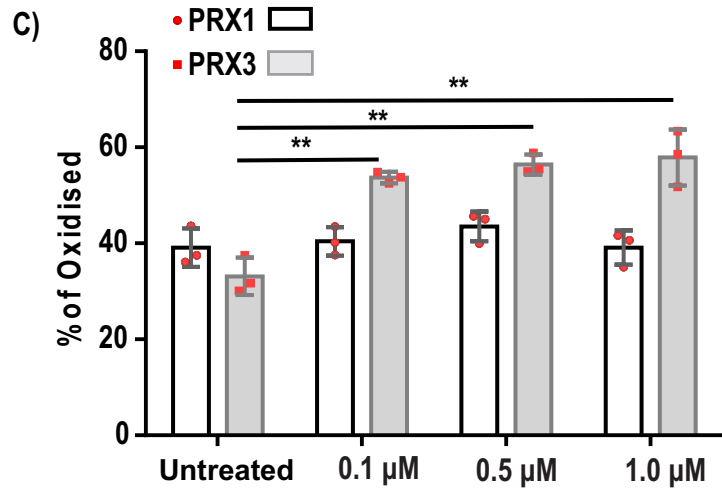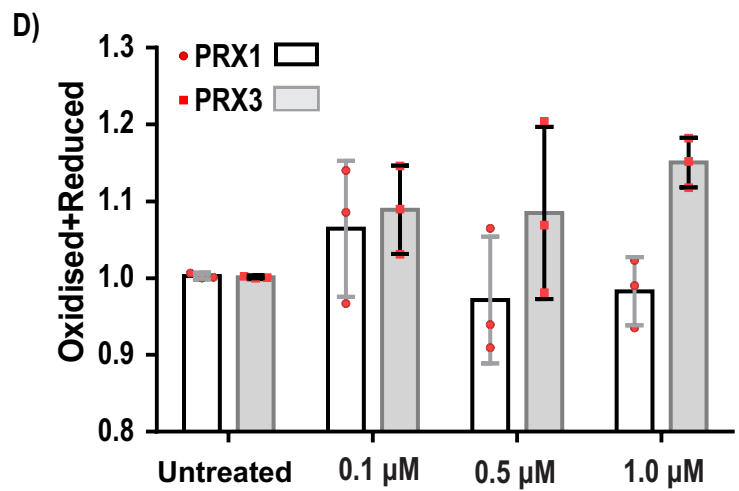

Supplemental Figure 6

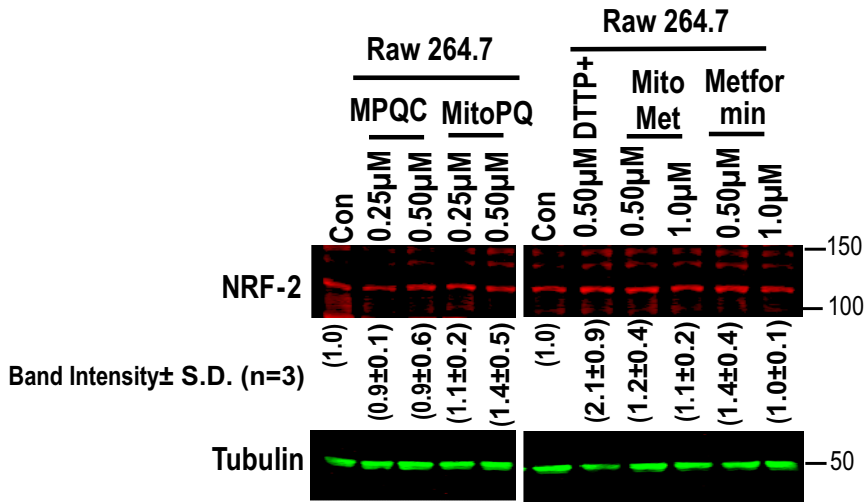

Supplement: mmc1.pdf [file mmc1.pdf]
